# Supplementary material for: Species Sensitivity Distribution of Dichlorvos in Surface Water Species
Source: Research Square preprint supplement (doi:10.21203/rs.3.rs-362506/v1), 2021-04-09
Supplement: Supplementary file 1 [file cc0411a4b9c1154e847edf4f.docx]

# Supplementary Information

## **Table A1.** Media used in experiments

| Reagents | M7  pH = 6.9-7.9 |  | Reagents | K-medium  pH = 4.9 – 5.2 |
| --- | --- | --- | --- | --- |
| CaCl2 ∙2 H2O | 293.80 mgL-1 |  | MgSO4 ∙ 7 H2O | 500.00 mgL-1 |
| MgSO4 ∙ 7 H2O | 123.30 mgL-1 |  | KH2PO4 | 503.20 mgL-1 |
| KCl | 5.80 mgL-1 |  | Na2EDTA ∙ 2 H2O | 9.00 mgL-1 |
| NaHCO3 | 64.8 mgL-1 |  | FeCl2 ∙ 6H2O | 5.40 mgL-1 |
| Na2SiO3 ∙ 5 H2O | 2.50 mgL-1 |  | MnCl ∙ 4 H2O | 3.62 mgL-1 |
| KH2PO4 | 0.143 mgL-1 |  | CuSO4 ∙ 5H2O | 0.08 mgL-1 |
| K2HPO4 | 0.184 mgL-1 |  | ZnSO4 ∙ 7H2O | 0.22 mgL-1 |
| Na2EDTA ∙ 2 H2O | 0.625 mgL-1 |  | KNO3 | 888.80 mgL-1 |
| FeSO4 ∙ 7H2O | 0.249 mgL-1 |  | Ca(NO3)2 ∙ 4 H2O | 944.00 mgL-1 |
| MnCl ∙ 4 H2O | 90.13 µgL-1 |  | H3BO3 | 2.86 mgL-1 |
| LiCl | 76.50 µgL-1 |  | Na2MoO4 ∙ 2 H2O | 0.12 mgL-1 |
| RbCl | 177.50 µgL-1 |  | Sucrose | 4100.00 mgL-1 |
| SrCl2 ∙ 6H2O | 38.00 µgL-1 |  | Tartaric acid | 3.00 mgL-1 |
| CuCl2 ∙ 2H2O | 4.19 µgL-1 |  |  |  |
| ZnCl2 | 13.00 µgL-1 |  |  |  |
| CoCl2 ∙ 6H2O | 10.00 µgL-1 |  |  |  |
| NaNO3 | 0.274 mgL-1 |  |  |  |
| H3BO3 | 0.714 mgL-1 |  |  |  |
| NaBr | 4.00 µgL-1 |  |  |  |
| Na2MoO4 ∙ 2 H2O | 15.40 µgL-1 |  |  |  |
| KI | 3.25 µgL-1 |  |  |  |
| Na2SeO3 | 2.19 µgL-1 |  |  |  |
| NH4VO3 | 0.575 µgL-1 |  |  |  |
| Thiamine hydrochloride | 75 µgL-1 |  |  |  |
| Cyanocobalmin (B12) | 1 µgL-1 |  |  |  |
| Biotin | 0.75 µgL-1 |  |  |  |

## **Table A2.1.** List of species Group A

| *Specie* |  | *Value* μgL-1 | *Reference* |
| --- | --- | --- | --- |
| *Daphnia pulex* | EC50 | 0,07  0.05-009 | Johnson & finley 1980 |
| *Pteronarcys californicus* | LC50 | 0,10  0.066-0.15 | Sanders & cope 1968 |
| *Daphnia magna* | EC50 | 0,223  0.225-0.242 | Sturm & Hansen 1999 |
| *Simocephalus serrulatus* | EC50 | 0,28  0.16-0.47 | Johnson & Finley 1980 |
| *Gammarus lacustris* | LC50 | 0,50  0.37-0.68 | Johnson & Finley 1980 |
| *Cheumatopsyche brevilineata* | LC50 | 1,17  1.14-1.21 | Yokoyama et al 2009 |
| *Anopheles stephensi* | LC50 | 3,00  2.00-7.00 | Chitra & Pillai 1984 |
| *Chironomus sp* | LC50 | 10-20 | Sturm & Hansen 1999 |
| *Misgurnus. anguillicaudatus* | LC50 | 7,168 | Nan et al. 2013 |
| *Culex tritaeniorhynchus* | LC50 | 16,00 | Self et al 1974 |
| *Chironomus tentans* | LC50 | 17,60  14.7-21.3 | Ankley & Collyard, 1995 |
| *Aedes vexans* | LC50 | 26,10  17.1-30.8 | Rettich 1977 |
| *Culex pipiens* | LC50 | 29,03  30.3  15.4-56.2 | Rongsriyam, (1968).  Rettich 1977 |
| *Aedes punctor* | LC50 | 45,80 | Rettich 1977 |
| *Aedes cantans* | LC50 | 50,40  15.7-77.9 | Rettich 1977 |
| *Hyalela azteca* | LC50 | 53,30  43.2-66.4 | Ankley & Collyard, 1995 |
| *Culex pipiens quinquefasciatus* | LC50 | 95,00 | [Zhao et al., 2014](https://journals.plos.org/plosone/article/file?id=10.1371/journal.pone.0095260&type=printable) |
| *Mytilus trossulus L.* | EC50 | 100,00 | Kopecka-Pilarczyk 2010 |
| *Oncorhynchus clarkij* | LC50 | 170  143-203 | Johnson & finley 1980 |
| *Salvelinus namaycush* | LC50 | 187  110-320 | Johnson & finley 1980 |
| *Pseudokirchneriella subcapitata* | EC50 | 737,00  698-770 | Yeh & Chen 2006 |
| *Lepomis macrochirus* | LC50 | 869  700-1080 | Johnson & finley 1980 |
| *Clarias gariepinus (Juvenile)* | LC50 | 1290,00  880-1640 | Nwani et al 2014 |
| *Heterobranchus longifilis* | LC50 | 1320,00  1150-1780 | Ekpo et al 2004 |
| *Xenopus laevis* | LC50 | 1767,84 | Fiona et al. 2014 |
| *Lombricutus variegatus* | LC50 | 2660,00  1940-3630 | Ankley & Collyard, 1995 |
| *Gambusia affinis* | LC50 | 5270,00  2660-10400 | Johnson & finley 1980 |
| *Poecilia reticulata* | LC50 | 5810,00 | Rongsriyam, 1968. |
| *Thiara torulosa* | LC50 | 8700,00  7580-10020 | Bharathi & Rao 1989 |
| *Cyprinus carpio L* | LC50 | 9410,00  7540-11490 | Ural & Calta 2005 |
| *Pimephales promelas* | LC50 | 11600  7830-17200 | Johnson & finley 1980 |
| *Abramis brama L* | LC50 | 16660,00  16140-17180 | Chuiko & Slynko 1995 |
| *Danio rerio (zebrafish embryo)* | LC50 | 39750,00 | Sisman et al. 2010 |

## **Table A2.2.** List of species Group B

| *Specie* |  | *Value µgL-1* | *Reference* |
| --- | --- | --- | --- |
| *Notonecta sp.* | LC50 | 1,23 | Konar S., 1969 |
| *Chironomus riparius* | EC50 | 8,73  6.2-10.4 | Fisher et al., 1993 |
| *Lymnaea acuminata* | LC50 | 14  11-17 | Tripathi et al., 1998 |
| *Chironomus sp* | EC50 | 16,7  12.1-18.9 | Fisher et al., 1993 |
| *Chironumus tentans* | LC50 | 17,05 | Pawar et al., 2012 |
| *Aedes aegypti* | LC50 | 22 | Don pedro et al., 1985 |
| *Sphaerodema annulatum* | LC50 | 85 | Konar S., 1969 |
| *Ranatra filiformis* | LC50 | 130 | Konar S., 1969 |
| *Anisospteran nymphs* | LC50 | 150 | Konar S., 1969 |
| *Cybister sp.* | LC50 | 210 | Konar S., 1969 |
| *Neva sp.* | LC50 | 269 | Konar S., 1969 |
| *Belostoma indica* | LC50 | 280 | Konar S., 1969 |
| *Cirrhinus mrigala (juvenile)* | LC50 | 290 | Verma et al., 1984 |
| *Anodonte cygnea* | LC50 | 331  284-381 | Varanka I., 1987 |
| *Anodonte anatina* | LC50 | 336  290-388 | Varanka I., 1987 |
| *Cyprinus carpio (juvenile)* | LC50 | 340 | Verma et al., 1981 |
| *Dytiscus sp. (adult)* | LC50 | 350 | Konar S., 1969 |
| *Hydrophilus s.* | LC50 | 350 | Konar S., 1969 |
| *Mystus vittatis* | LC50 | 450 | Verma et al., 1983 |
| *Pila ovata* | LC50 | 540 | Ariole et al., 2013 |
| *Unio pictorum* | LC50 | 685  583-795 | Varanka I., 1987 |
| *Anguilla anguilla* | LC50 | 852  735-957 | Peña-Llopis et al., 2003 |
| *Puntius sophore* | LC50 | 1000 | Konar S., 1969 |
| *Ophiocephalus punctatus* | LC50 | 2300 | Verma et al., 1981 |
| *Trichogaster fasciatus(Adult)* | LC50 | 2420 | Konar S., 1969 |
| *Nandus nandus* | LC50 | 2600 | Konar S., 1969 |
| *Mastocembelus puncalus* | LC50 | 2630 | Konar S., 1969 |
| *Rita rita* | LC50 | 2750 | Konar S., 1969 |
| *Esomus danrica* | LC50 | 2810 | Konar S., 1969 |
| *Channa punctatus* | LC50 | 2880 | Konar S., 1969 |
| *Amphipnous cuchia* | LC50 | 3380 | Konar S., 1969 |
| *Macrognathus aculeatum* | LC50 | 3550 | Konar S., 1969 |
| *Saccobranchus fossilis* | LC50 | 6610 | Verma et al., 1983 |
| *Catls catla* | LC50 | 8200 | Rajput V. 2012 |
| *Clarias batrachus* | LC50 | 8880 | Verma et al., 1983 |
| *Anabas testudineus* | LC50 | 11740 | Konar 1969 |
| *Labeo rohita* | LC50 | 12355 | Konar S., 1969 |
| *Oreochromis mossambicus* | LC50 | 12800  11200-14400 | Frumin et al., 1992 |
| *Heteropneustes fossilis* | LC50 | 17780 | Konar S., 1969 |
| *Bellamya dissimilis* | LC50 | 20890  19960-23430 | Jannalagadda & Rao 1996 |
| *M. wesenbergii* | EC50 | 57711 | Sun et al., 2015 |

## **Table A3**. Chemical controls in acute assay.

Percentage of measured concentration (Cm) as ratio of Nominal concentration (Cn) in presented in first column. Three samples that belong to bigger organisms were measured respect to initial concentration and results are expressed as ratio between final concentration (Cf) and initial concentration (Ci).

| Sample | Cm/Cn | Cf/Ci |
| --- | --- | --- |
| stock 80 mgL (Daphnia/Christalynus) | 0.98 | --- |
| stock 1000 mgL | 0.80 | --- |
| stock 10 mg,mL | 0.89 | --- |
| stock 800 mgL | 0.99 | --- |
| stock 1030 mgL | 0.89 | --- |
| Snail L5 Ci | 0.85 | --- |
| C. riparius L6 Cf | 0.78 | --- |
| Hyalella L5 Cf | 0.92 | --- |
| Gamma L7 Cf | 0.88 | --- |
| Lemna L6 Cf | --- | 0.96 |
| Tubifex L6 Cf | --- | 0.89 |

1. **Figure A1**. Standard curve obtained under HPLC-MS analysis. Concentration expressed as μg L-1.


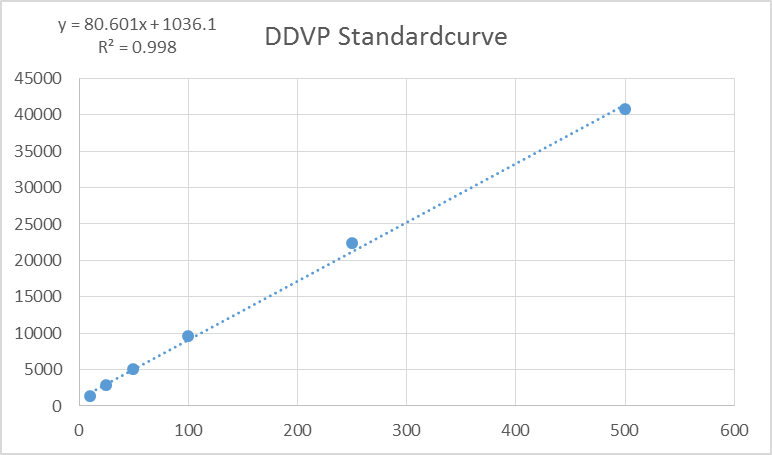


1. **Table A5**. Hydrolysis half-life of dichlorvos at different pH and temperature values according to APVMA, 2008.


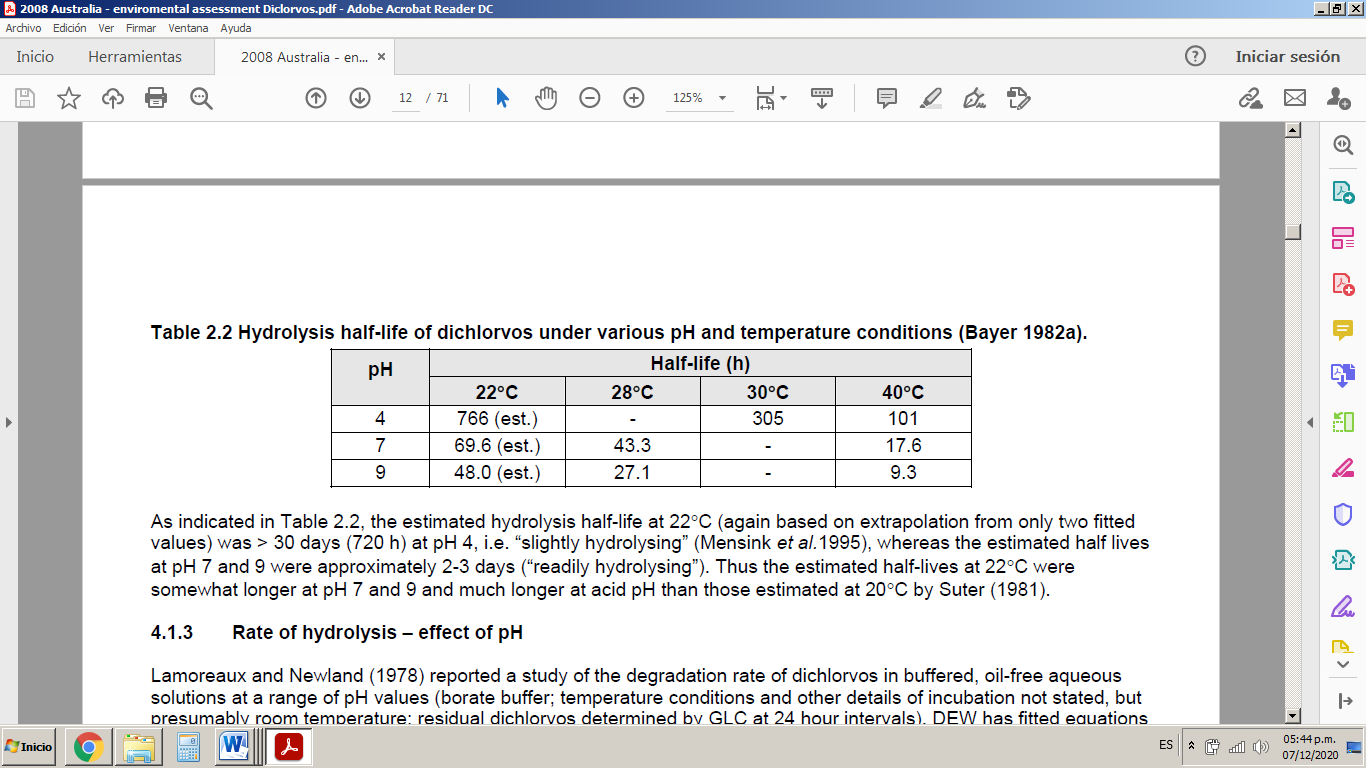


## **Bibliograhy**

Ankley, G. T., & Collyard, S. A. (1995). Influence of piperonyl butoxide on the toxicity of organophosphate insecticides to three species of freshwater benthic invertebrates. *Comparative Biochemistry and Physiology Part C: Pharmacology, Toxicology and Endocrinology*, 110(2), 149-155. <https://doi.org/10.1016/0742-8413(94)00098-U>.

Ariole, C. N., & Ezevununwo, O. (2013). Acute toxicity of dichlorvos on tropical freshwater snail (*Pila ovata*). *International Journal of Biosciences*, 3(1), 70-75. ISSN: 2220-6655. <https://www.innspub.net/wp-content/uploads/file/IJB-V3No1-p70-75.pdf>.

Bharathi, C., & Prasada Rao, D. G. V. (1989). Toxicity to and oxygen consumption of the freshwater snailThiara (Stenomelania) torulosa (bruguiere) in relation to organophosphorus insecticide exposure. *Bulletin of environmental contamination and toxicology*, 42(5), 773-777. <https://doi.org/10.1007/BF01700402>

Chitra, S., & Pillai, M. K. K. (1984). Development of organophosphorus and carbamate-resistance in Indian strains of Anopheles Stephensi Liston. *Proceedings: Animal Sciences*, *93*(3), 159-170. <https://doi.org/10.1007/BF03186277>

Chuiko, G. M., & Slynko, Y. V. (1995). Relation of allozyme genotype to survivorship of juvenile bream, Abramis brama L., acutely exposed to DDVP, an organophosphorus pesticide. *Bulletin of environmental contamination and toxicology*, *55*(5), 738-745. <https://doi.org/10.1007/BF00203761>.

Don-Pedro, K. N., & Adegbite, T. O. (1985). Nuvan resistance in a field strain of Aedes aegypti (L.) in Lagos, Nigeria. *Environmental Pollution Series A, Ecological and Biological*, *38*(1), 19-29. <https://doi.org/10.1016/0143-1471(85)90091-1>.

Ekpo, A. O., & Okorie, F. C. (2004). The effect of two pesticides dichlorvos and paraquat on Heterobranchus longifilis (Valenciennes). Global Journal of Pure and Applied Sciences, 10(1), 55-60. <http://dx.doi.org/10.4314/gjpas.v10i1.16358>

Fiona et al. 2014 // Watson, F. L., Schmidt, H., Turman, Z. K., Hole, N., Garcia, H., Gregg, J., ... & Fradinger, E. A. (2014). Organophosphate pesticides induce morphological abnormalities and decrease locomotor activity and heart rate in Danio rerio and Xenopus laevis. *Environmental toxicology and chemistry*, 33(6), 1337-1345. <https://doi.org/10.1002/etc.2559>

Fisher, S. W., Lydy, M. J., Barger, J., & Landrum, P. F. (1993). Quantitative structure-activity relationships for predicting the toxicity of pesticides in aquatic systems with sediment. *Environmental Toxicology and Chemistry: An International Journal*, 12(7), 1307-1318.  <https://doi.org/10.1002/etc.5620120721>.

Frumin, G. T., Chuiko, G. M., Pavlov, D. F., & Menzykova, O. V. (1992). New rapid method to evaluate the median effect concentrations of xenobiotics in hydrobionts. Bulletin of environmental contamination and toxicology, 49(3), 361-367. DOI: 10.1007/bf01239638

Johnson, W. W., & Finley, M. T. (1980). Handbook of acute toxicity of chemicals to fish and aquatic invertebrates: Summaries of toxicity tests conducted at Columbia National Fisheries Research Laboratory, 1965-78 (No. 137). US Fish and Wildlife Service. <https://pubs.er.usgs.gov/publication/rp137>

Jannalagadda, P. R., & Rao M, B. P. (1996). Histopathological changes induced by specific pesticides on some tissues of the fresh water snail, Bellamya dissimilis Müller. *Bulletin of environmental contamination and toxicology*, 57(4), 648-654. <https://doi.org/10.1007/s001289900239>.

Konar, S. K. (1969). Laboratory studies on two organophosphorus insecticides, DDVP and phosphamidon, as selective toxicants. *Transactions of the American Fisheries Society*, *98*(3), 430-437. [https://doi.org/10.1577/1548-8659(1969)98[430:LSOTOI]2.0.CO;2](https://doi.org/10.1577/1548-8659(1969)98%5b430:LSOTOI%5d2.0.CO;2).

Kopecka-Pilarczyk, J. (2010). The effect of pesticides and metals on acetylcholinesterase (AChE) in various tissues of blue mussel (Mytilus trossulus L.) in short-term in vivo exposures at different temperatures. *Journal of Environmental Science and Health Part B*, 45(4), 336-346. <https://doi.org/10.1080/03601231003704390>.

Nan, P., Yan, S., Li, L., Chen, J., Du, Q., & Chang, Z. (2013). Toxicity effect of dichlorvos on loach (Misgurnus anguillicaudatus) assessed by micronucleus test, hepatase activity analysis and comet assay. *Toxicology and industrial health*, *31*(6), 566-575. <https://doi.org/10.1177/0748233713475512>

Nwani, C. D., Ifo, C. T., Ejere, V. C., Okoye, S. O., Onyeke, C. C., Ogbonna, S. U., ... & Oluah, S. N. (2014). Comparative evaluation of the acute toxicity and behavioural changes in Clarias gariepinus following exposure to dichlorvos and primextra pesticides. *Zoology and Ecology,* 24(4), 361-368. <https://doi.org/10.1080/21658005.2014.939822>

Pawar, B. A., Gite, A. B., Shendge, A. N., & Pandarka, A. K. (2012). Acute toxicity and impact of nuvan on biochemical content of larvae of Chironomus tentans-Meigen (Diptera: Chironomidae). *Journal of Experimental Zoology, India*, *15*(1), 23-26. **ISSN:** [0972-0030](https://www.cabdirect.org/cabdirect/search/?q=sn%3a%220972-0030%22)20123124183. [https://www.cabdirect.org/cabdirect/abstract/ 20123124183](https://www.cabdirect.org/cabdirect/abstract/%2020123124183).

Peña-Llopis, S., Ferrando, M. D., & Peña, J. B. (2003). Fish tolerance to organophosphate-induced oxidative stress is dependent on the glutathione metabolism and enhanced by N-acetylcysteine. *Aquatic Toxicology*, *65*(4), 337-360. <https://doi.org/10.1016/S0166-445X(03)00148-6>

Pickering, Q. H., & Henderson, C. (1966c). The acute toxicity of some pesticides to fish. *Ohia Journal of Science*. 66, 508-513. <https://kb.osu.edu/bitstream/handle/1811/5223/V66N05_508.pdf?se..>

Rajput, V. (2012). TOXIC EFFECT OF EXPIRED PESTICIDES ON CATLA CATLA OF THE GAULA STREAM, INDIA. *Croatian Journal of Fisheries*, 70(4), 187-196. <https://hrcak.srce.hr/95467>

Rettich, F. (1977). The susceptibility of mosquito larvae to eighteen insecticides in Czechoslovakia. Mosq. News, 37(2), 252-257. <https://www.biodiversitylibrary.org/content/part/JAMCA/MN_V37_N2_P252-257.pdf>.

Rongsriyam, Y. U. P. A., Prownebon, S. U. R. A. P. O. N., & Hirakoso, S. H. U. N. N. O. S. U. K. E. (1968). Effects of insecticides on the feeding activity of the guppy, a mosquito-eating fish, in Thailand. *Bulletin of the World Health Organization*, 39(6), 977. PMCID: PMC2554599.

Sanders, H. O., & Cope, O. B. (1968). The relative toxicities of several pesticides to naiads of three species of stoneflies. *Limnology and Oceanography*, *13*(1), 112-117. <https://doi.org/10.4319/lo.1968.13.1.0112>

Self, L. S., Shim, J. C., & Jolivet, P. (1974). Susceptibility of Culex tritaeniorhynchus and six other mosquitos to insecticides in Korea. *Cahiers ORSTOM, Serie Entomologie Medicale et Parasitologie*, *12*(2), 81-91. <http://horizon.documentation.ird.fr/exl-doc/pleins_textes/cahiers/entomo/19016.pdf>.

Şişman, T. (2010). Dichlorvos-induced developmental toxicity in zebrafish. *Toxicology and industrial health*, *26*(9), 567-573. [https://doi.org/10.1177/0748233710373089](https://doi.org/10.1177%2F0748233710373089)

Sturm, A., & Hansen, P. D. (1999). Altered cholinesterase and monooxygenase levels in Daphnia magna and Chironomus riparius exposed to environmental Pollutants. *Ecotoxicology and Environmental Safety*, *42*(1), 9-15. <https://doi.org/10.1006/eesa.1998.1721>.

Sun, K. F., Xu, X. R., Duan, S. S., Wang, Y. S., Cheng, H., Zhang, Z. W., ... & Hong, Y. G. (2015). Ecotoxicity of two organophosphate pesticides chlorpyrifos and dichlorvos on non-targeting cyanobacteria Microcystis wesenbergii. *Ecotoxicology*, 24(7-8), 1498-1507. <https://doi.org/10.1007/s10646-015-1458-0>.

Tripathi, A. M., & Agarwal, R. A. (1998). Molluscicidal and anti-AChE activity of tertiary mixtures of pesticides. *Archives of environmental contamination and toxicology*, 34(3), 271-274. https://doi.org/10.1007/s002449900317.

Ural, M. Ş., & Calta, M. (2005). Acute toxicity of dichlorvos (DDVP) to fingerling mirror carp, Cyprinus carpio L. *Bulletin of environmental contamination and toxicology*, *75*(2), 368-373. https://doi.org/10.1007/s00128-005-0763-3.

Varanka, I. (1987). Effect of mosquito killer insecticides on freshwater mussels. *Comparative Biochemistry and Physiology Part C: Comparative Pharmacology*, 86(1), 157-162. <https://doi.org/10.1016/0742-8413(87)90159-9>.

Verma, S. R., Rani, S., Tonk, I. P., & Dalela, R. C. (1983). Pesticide-induced dysfunction in carbohydrate metabolism in three freshwater fishes. *Environmental research,* 32(1), 127-133. <https://doi.org/10.1016/0013-9351(83)90199-8>

Verma, S. R., Tonk, I. P., & Dalela, R. C. (1981). Determination of the maximum acceptable toxicant concentration (MATC) and the safe concentration for certain aquatic pollutants. *Acta hydrochimica et hydrobiologica*, 9(3), 247-254.  <https://doi.org/10.1002/aheh.19810090303>.

Verma, S. R., Tonk, I. P., Gupta, A. K., & Saxena, M. (1984). Evaluation of an application factor for determining the safe concentration of agricultural and industrial chemicals. *Water research*, *18*(1), 111-115. <https://doi.org/10.1016/0043-1354(84)90055-1> .

Yeh, H. J., & Chen, C. Y. (2006). Toxicity assessment of pesticides to *Pseudokirchneriella subcapitata* under air-tight test environment. *Journal of hazardous materials*, 131(1-3), 6-12. <https://doi.org/10.1016/j.jhazmat.2005.09.009>.

Yokoyama, A., Ohtsu, K., Iwafune, T., Nagai, T., Ishihara, S., Kobara, Y., ... & Endo, S. (2009). A useful new insecticide bioassay using first-instar larvae of a net-spinning caddisfly, Cheumatopsyche brevilineata (Iwata, 1927)(Trichoptera: Hydropsychidae). *Journal of Pesticide Science*, 0811140065-0811140065. <https://www.jstage.jst.go.jp/article/jpestics/advpub/0/advpub_G08-26/_pdf>.

Zhao, M., Dong, Y., Ran, X., Wu, Z., Guo, X., Zhang, Y., ... & Zhang, H. (2014). Point mutations associated with organophosphate and carbamate resistance in Chinese strains of Culex pipiens quinquefasciatus (Diptera: Culicidae). *PloS one*, 9(5), e95260. doi:10.1371/journal.pone.0095260.
